# Supplementary material for: WHotLAMP: A simple, inexpensive, and sensitive molecular test for the detection of SARS-CoV-2 in saliva
Source: PLOS journal article supplement (doi:10.1371/journal.pone.0257464), 2021-09-16
Supplement: S3 (10.1371/journal.pone.0257464.s003) [file journal.pone.0257464.s003]

1. In a 1.7 mL microfuge tube with a 2x3 mm piece of Whatman No. 1 paper glued with Kwik-Sil™ to the side, 1 mm from the bottom, mix in:
  - 100 µL saliva
  - 50 µL RNAlater™ (R0901, Sigma) or 'Homebrew' (see below)
  - 25 µL Proteinase K (10 mg/mL; PB0451, BioBasic)
2. Pipette up and down ~20x to mix well
3. Incubate at ~26°C for 5 min (but not below 22 °C)
4. Incubate at 95°C for 5 min
5. Remove liquid by decanting or using a pipette
6. Add 1 mL Wash Buffer and **invert vigorously** 20 times
7. Incubate at room temperature for 1 min
8. Remove liquid by decanting or using a pipette
9. Add 1 mL Wash Buffer, incubate at room temperature for 1 min, then remove liquid (this is a brief rinse) leaving as little Wash Buffer as possible
10. Add 50 µL of LAMP rxn mix using ZI-1 primers. (If a control reaction for RNA extraction from saliva is desired, use RAB7A primers instead)
11. Take photo of tube(s) as baseline
12. Incubate 65°C for 20 min
13. Cool to room temperature (or to 4°C to maximize color difference between negative and positive reactions)
14. Examine tubes visually for pink (negative) or yellow (positive) color change

#### Wash Buffer

|                     |                    |
|---------------------|--------------------|
| 1 mM Tris-Cl pH 8.0 | T4661-100G (Sigma) |
| 0.1 mM EDTA pH 8.0  | E9884-100G (Sigma) |
| 0.1 % Tween-20      | P9416-50ML (Sigma) |

#### LAMP mix (per reaction)

|       |                                                                       |
|-------|-----------------------------------------------------------------------|
| 25 µL | 2x WarmStart® Colorimetric LAMP mix (NEB, M1800L)                     |
| 5 µL  | 400 mM guanidine hydrochloride (G3272, Sigma, made fresh from powder) |
| 5 µL  | ZI-1 10x primers (16 µM FIP/BIP, 2 µM F3/B3, 4 µM LF/LB)              |
| 15 µL | water                                                                 |

#### Homebrew RNAlater:

|                         |                    |
|-------------------------|--------------------|
| 3.54 M ammonium sulfate | A4418-500G (Sigma) |
| 16.6 mM sodium citrate  | C8532-500G (Sigma) |
| 13.3 mM EDTA            | E9884-100G (Sigma) |

#### Primers

|          |                                            |
|----------|--------------------------------------------|
| ZI-1-F3  | GGATACAAGTACTAGCTACAGAGAA                  |
| ZI-1-B3  | CCACAAGTTACTTGTACCATAC                     |
| ZI-1-FIP | TTGGTAAAGAACATCAGAACCTGAGGCTGCTTGTTCATCTC  |
| ZI-1-BIP | CCACCACAAACCTCTATCACCTAACCCCTCAACTTACCAGAT |
| ZI-1-LF  | AAGTCATTGAGAGCCTTTGC                       |
| ZI-1-LB  | GTGGTTTTAGAAAAATGGCATTCCC                  |
| RAB7A-F3 | ACAGGCCTGGTGCTACAG                         |
| RAB7A-B3 | CTGCAGCTTTCTGCCGAG                         |

|           |                                           |
|-----------|-------------------------------------------|
| RAB7A-FIP | CAATCGTCTGGAACGCCTGCTCCCTACTTTGAGACCAGTGC |
| RAB7A-BIP | AAGCAGGAAACGGAGGTGGAGGCCCGGTCATTCTGTCC    |
| RAB7A-LF  | ACGTTGATGGCCTCCTTG                        |
| RAB7A-LB  | TGTACAACGAATTCCTGAACC                     |

#### Notes:

- For gluing Whatman No. 1 paper, use as little Kwik-Sil™ as possible to maximize surface area exposed to saliva mixture. Ideally, allow Kwik-Sil to cure overnight before using.
- We found item <https://cardholepunch.com/products/custom-loyalty-card-hole-punch?variant=7789589790786> (custom shape ID: ND15) worked very well to rapidly punch out Whatman No. 1 pieces, with the tapered end exposed to Kwik-Sil and facing the top of the tube.
- The volume of saliva can be larger than 100 µL as long as the other components are scaled accordingly.
- We have found that incubation of the saliva mixture with Whatman paper can occur between 26°C and 37°C. Our testing was consistent at 26°C. Lower incubation temperatures (e.g. <22°C) may lead to unreliable results, presumably because the activity of Proteinase K is too low.
- The washing steps are important to remove residual RNAlater soaked in the Whatman paper which can affect the LAMP reaction.
- Use of freshly prepared guanidine hydrochloride solution in the LAMP reaction increases the sensitivity of the colorimetric assay.
- For WHotLAMP assays in 1.7 mL microfuge tubes, the 20 min incubation time at 65°C is important. Extended incubation times (e.g. >25 min at 65°C) can lead to non-specific colorimetric change in the negative control. For saliva samples with high SARS-CoV-2 titers, a colorimetric change can be detected in as little as 10 min at 65°C.
- Cooling tubes after the 65°C incubation step to ~4°C helps to bring out the color contrast between positive and negative colorimetric LAMP results.
